# Supplementary material for: Elevating CDCA3 Levels Enhances Tyrosine Kinase Inhibitor Sensitivity in TKI-Resistant EGFR Mutant Non-Small-Cell Lung Cancer
Source: MDPI journal article supplement (doi:10.3390/cancers13184651), 2021-09-16
Supplement: s1 [file s1]

# Supplementary Material: Elevating CDCA3 Levels Enhances Tyrosine Kinase Inhibitor Sensitivity in TKI-Resistant EGFR Mutant Non-Small-Cell Lung Cancer

Katherine B. Sahin <sup>1</sup>, Esha T. Shah <sup>1</sup>, Genevieve P. Ferguson <sup>1</sup>, Christopher Molloy <sup>1</sup>, Priyakshi Kalita-de Croft <sup>2</sup>, Sarah A. Hayes <sup>3</sup>, Amanda Hudson <sup>3</sup>, Emily Colvin <sup>3</sup>, Hannah Kamitakahara <sup>3</sup>, Rozelle Harvie <sup>3</sup>, Csilla Hasovits <sup>3</sup>, Tashbib Khan <sup>4</sup>, Pascal H.G. Duijf <sup>1,5,6,7,8</sup>, Viive M. Howell <sup>3</sup>, Yaowu He <sup>4</sup>, Emma Bolderson <sup>1</sup>, John D. Hooper <sup>4</sup>, Sunil R. Lakhani <sup>2</sup>, Derek J. Richard <sup>1</sup>, Kenneth J. O'Byrne <sup>1,9,\*</sup> and Mark N. Adams <sup>1,\*</sup>

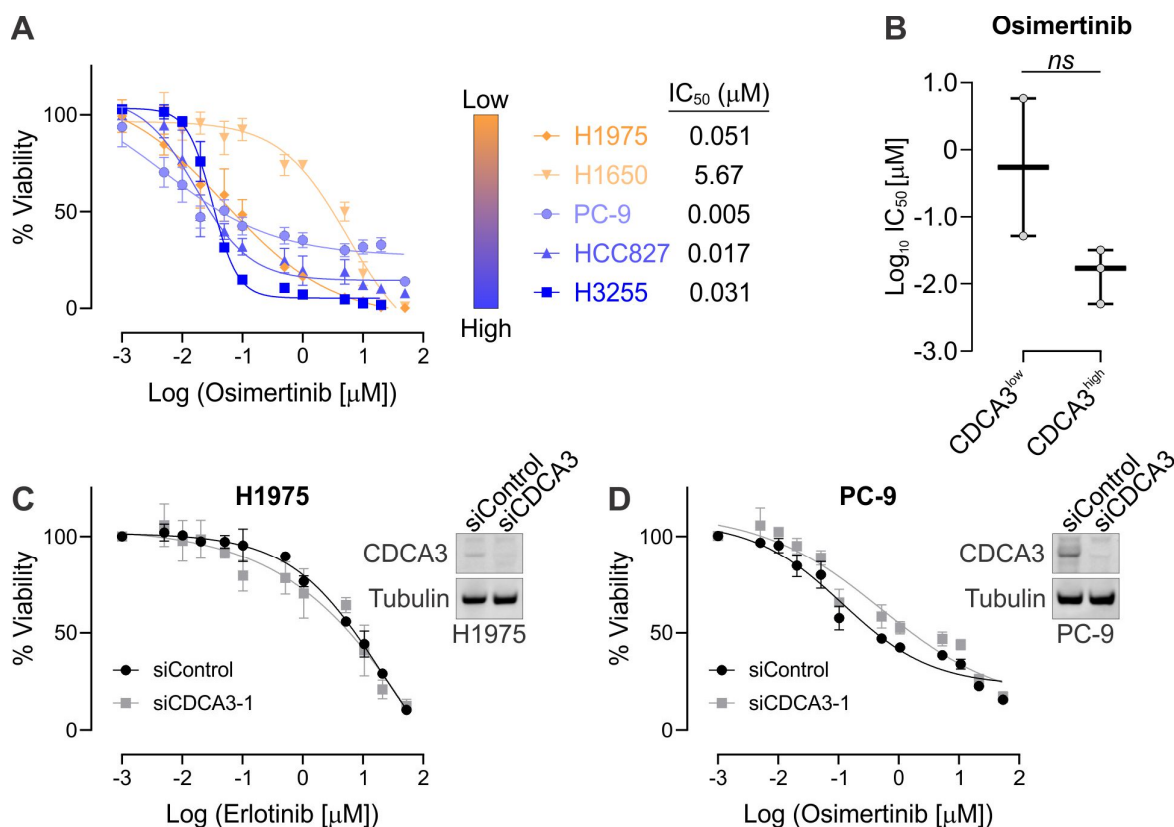

**Figure S1.** (A) *Left panel*, Dose response curves for five EGFR mutant NSCLC cell lines treated with escalating doses of osimertinib. Cells were treated with osimertinib for 72 hours before assessing cell viability. *Right panel*, Cell lines ranked by CDCA3 protein levels where osimertinib potency values (IC<sub>50</sub>) were calculated using GraphPad Prism and listed for each cell line.  $n = 4$ . (B) Box and whisker plot showing osimertinib potency ( $\log_{10}$  IC<sub>50</sub> value) in CDCA3<sup>low</sup> and CDCA3<sup>high</sup> EGFR mutant cell lines (unpaired Student's  $t$  test, ns = not significant). (C) *Left panel*, Dose response curves for control (siControl) or CDCA3 depleted (siCDCA3) H1975 cells treated with escalating doses of erlotinib for 72 hours before assessing cell viability. *Right panel*, Endogenous CDCA3 western blot analysis from lysates of control or CDCA3 depleted H1975 cells. Tubulin was used as loading control. (D) *Left panel*, Dose response curves for control (siControl) or CDCA3 depleted (siCDCA3) PC-9 cells treated with escalating doses of osimertinib for 72 hours before assessing cell viability. *Right panel*, Endogenous CDCA3 western blot analysis from lysates of control or CDCA3 depleted PC-9 cells. Tubulin was used as loading control.



determined by histone H3 pS10 staining and high throughput immunofluorescence microscopy of vector transfected or CDCA3-FLAG ectopically expressing HCC827 isogenic parental and TKI resistant cells. Data points represent an average percentage of mitotic nuclei per field of view from a minimum of 1100 nuclei (n = 23 fields total). Blue lines indicate median values. ns = not significant. **(D)** Cellular proliferation analysis of vector transfected or CDCA3-FLAG ectopically expressing HCC827 isogenic parental and TKI resistant cells over 96 h using the Incucyte Zoom live cell imaging system.
